# Supplementary material for: A molecular vision of fungal cell wall organization by functional genomics and solid-state NMR
Source: Nat Commun. 2021 Nov 3;12:6346. doi: 10.1038/s41467-021-26749-z (PMC8566572; doi:10.1038/s41467-021-26749-z)
Supplement: Supplementary file 4 — Source Data [file 41467_2021_26749_MOESM4_ESM.xlsx]

## Sheet: Fig 1d
Fig. 1d, Composition of carbohydrates in the rigid region of the cell wall
parental									α-1,3-glucan def.									Chitin def.									GM def.										GAG def.
Polysaccharide		Cross peaks		Abs. Area	Molar Fraction		Error		Polysaccharide		Cross peaks		Abs. Area	Molar Fraction		Error		Polysaccharide		Cross peaks		Abs. Area	Molar Fraction		Error		Polysaccharide		Cross peaks		Abs. Area	Molar Fraction		Error			Polysaccharide		Cross peaks		Abs. Area	Molar Fraction		Error
		F1	F2								F1	F2								F1	F2								F1	F2									F1	F2
β-1,3-glucan		C1	C3	70713000	0.5		0.06		β-1,3-glucan		C1	C3	4074800000	0.95		0.09		β-1,3-glucan		C1	C3	1936400000	0.42		0.04		β-1,3-glucan		C1	C3	600060000	0.25		0.02			β-1,3-glucan		C1	C3	1366600000	0.58		0.05
		C1	C5	28830000							C1	C5	2441600000							C1	C5	1301100000							C1	C5	353030000								C1	C5	918470000
		C1	C4	61850000							C1	C4	3883200000							C1	C4	1961900000							C1	C4	642060000								C1	C4	1407300000
		C3	C4	59700000							C3	C4	3995700000							C3	C4	1241900000							C3	C4	642920000								C3	C4	1348900000
		C3	C5	33412000							C3	C5	2526000000							C3	C5	1953700000							C3	C5	647950000								C3	C5	890340000
		C3	C2	48822000							C3	C2	4269200000							C3	C2	1789100000							C3	C2	647950000								C3	C2	1468300000
		C5	C4	59913000							C5	C4	3676000000							C5	C4	1742400000							C5	C4	677580000								C5	C4	1351000000
		C2	C4	62574000							C2	C4	3943900000							C2	C4	2228800000							C2	C4	801710000								C2	C4	1434100000
																				C5	C2	1159900000
α-1,3-glucan		C1	C4	69156000	0.42		0.07											α-1,3-glucan		C1	C4	5770300000	0.58		0.05		α-1,3-glucan		C1	C4	1208500000	0.32		0.03			α-1,3-glucan		C1	C4	565810000	0.36		0.05
		C1	C2/5	103240000																C1	C2/5	1973000000							C1	C2/5	1363700000								C1	C2/5	2205100000
		C3	C2/5	54964000																C3	C2/5	2461300000							C3	C2/5	1625300000								C3	C2/5	1491600000
		C3	C4	39811000																C3	C4	4093400000							C3	C4	699550000								C3	C4	513910000
chitin		C1	C4	475190	0.08		0.03		chitin		C1	C4	213870000	0.053		0.006											chitin		C1	C4	1017900000	0.43		0.06			chitin		C1	C4	72993000	0.008		0.008
		C1	C5	5499700							C1	C5	62884000																C1	C5	706750000								C1	C2	180350000
		C1	C2	29112000							C1	C2	296070000																C1	C2	1872900000								C1	C3	129520000
		C1	C3	14452000							C1	C3	156190000																C1	C3	1181600000								C4	C2	163240000
		C4	C2	11299000							C4	C2	192060000																C4	C2	886280000								C4	C3	134580000
		C4	C3	800640							C4	C3	184890000																C4	C3	1282700000								C4	C5	70519000
		C4	C5	12047000							C4	C5	134000000																C4	C5	619320000								C5	C3	110640000
		C5	C3	4395800							C5	C3	278050000																C5	C3	975350000								C3	C2	203530000
		C3	C2	8200300							C3	C2	237660000																C3	C2	1930100000								C5	C2	98760000
		C5	C2	4395800							C5	C2	279440000																C5	C2	606270000

## Sheet: Fid 2c,2d 
Fig. 2c, Composition of carbohydrates in the mobile region of the cell wall
parental										α-1,3-glucan def.										Chitin def.										GM def.										GAG def.
molecule	Spin Pairs		Abs. Area	Abs. Area	Molar Fraction	Error	Total GM	Error		molecule	Spin Pairs		Abs. Area	Abs. Area	Molar Fraction	Error	Total GM	Error		molecule	Spin Pairs		Abs. Area	Abs. Area	Molar Fraction	Error	Total GM	Error		molecule	Spin Pairs		Abs. Area	Abs. Area	Molar Fraction	Error	Total GM	Error		molecule	Spin Pairs		Abs. Area	Abs. Area	Molar Fraction	Error	Total GM	Error
α-1.6-mannan	C1	C2	4418900	5304600	0.051	0.003				α-1.6-mannan	C1	C2	106200000	277720000	0.04	0.01				α-1.6-mannan	C1	C2	439550000	252760000	0.07	0.01				α-1.6-mannan	C1	C2	62742000	59742000	0.0097	0.0007				α-1.6-mannan	C1	C2	341260000	305300000	0.08	0.02
	C3	C4	5294600	4586900							C3	C4	278620000	96200000							C3	C4	322760000	259550000							C3	C4	53442000	67842000							C3	C4	167300000	455440000
α-1.2-mannan	C1	C2	24275000	20781000	0.24	0.01				α-1.2-mannan	C1	C2	353500000	119490000	0.05	0.01				α-1.2-mannan	C1	C2	476960000	358850000	0.09	0.01				α-1.2-mannan	C1	C2	40198000	35124000	0.0062	0.0005				α-1.2-mannan	C1	C2	40198000	350430000	0.07	0.008
	C4	C5	21981000	25865000							C4	C5	283400000	177560000							C4	C5	388850000	266960000							C4	C5	45126000	35998000							C4	C5	288630000	231550000
galactofuranose	C1	C2	16608000	21353000	0.2	0.02	0.49	0.03		galactofuranose	C1	C2	1150700000	1190600000	0.27	0.02	0.36	0.03		galactofuranose	C1	C2	1043700000	771550000	0.2	0.03	0.36	0.03		galactofuranose	C1	C2	567790000	407680000	0.078	0.009	0.094	0.009		galactofuranose	C1	C2	1383800000	1269300000	0.33	0.03	0.48	0.04
	C3	C4	15898000	22563000							C3	C4	1197660000	1120700000							C3	C4	591550000	943700000							C3	C4	407790000	588790000							C3	C4	1066800000	1514200000
							Total GAG	Error									Total GAG	Error									Total GAG	Error									Total GAG	Error
galactopyranose	C2	C3	28924000	25655000	0.27	0.02				galactopyranose	C2	C3	546670000	625360000	0.14	0.01				galactopyranose	C2	C3	1323500000	895280000	0.28	0.04				galactopyranose	C2	C3	1848900000	2478000000	0.33	0.03				galactopyranose					0
	C4	C5	27354000	23205000							C4	C5	665670000	577360000							C4	C5	1574500000	996170000							C4	C5	1895900000	2079000000
galactasoamine	C1	C2	17862000	8190500	0.13	0.03				galactasoamine	C1	C2	193190000	192680000	0.045	0.008				galactasoamine	C1	C2	77596000	24697000	0.013	0.004				galactasoamine	C1	C2	978900000	1056200000	0.22	0.04				galactasoamine					0
	C3	C4	8240500	15912000							C3	C4	252680000	143670000							C3	C4	34697000	92396000							C3	C4	2010200000	1542900000
N-acetylgalactasoamine	C1	C2	4456800	7286800	0.06	0.01	0.46	0.04		N-acetylgalactasoamine	C1	C2	179020000	95000000	0.03	0.005	0.22	0.02		N-acetylgalactasoamine	C1	C2	79406000	111160000	0.02	0.004	0.31	0.04		N-acetylgalactasoamine	C1	C2	1287600000	883450000	0.19	0.03	0.74	0.06		N-acetylgalactasoamine					0
	C3	C4	7715800	4377800							C3	C4	97000000	159260000							C3	C4	51160000	109406000							C3	C4	887890000	1489600000
α-1.3-glucan	C1	C2	651130	906300	0.0083	0.0009														α-1.3-glucan	C1	C2	949850000	803320000	0.19	0.03				α-1.3-glucan	C1	C2	718690000	540680000	0.1	0.01				α-1.3-glucan	C1	C2	457810000	304030000	0.1	0.01
	C4	C5	992200	672630																	C4	C5	503320000	999850000							C4	C5	541760000	818690000							C4	C5	312830000	479810000
β-1,3-glucan	C1	C2	6143100	2922400	0.04	0.01				β-1,3-glucan	C1	C2	1436800000	2298900000	0.42	0.08				β-1,3-glucan	C1	C2	604820000	670360000	0.14	0.03				β-1,3-glucan	C1	C2	439870000	258030000	0.058	0.009				β-1,3-glucan	C1	C2	1920800000	1407900000	0.42	0.04
	C4	C5	1812600	5623100							C4	C5	2452900000	1189600000							C4	C5	840360000	304820000							C4	C5	299030000	476870000							C4	C5	1333900000	1876800000
Fig. 2d, Change in percentage of the components present in GAG with mutation
parental										α-1,3-glucan def.										chitin def.										GM def.
molecule	Spin Pairs		Abs. Area	Abs. Area	Molar Fraction	Error				molecule	Spin Pairs		Abs. Area	Abs. Area	Molar Fraction	Error				molecule	Spin Pairs		Abs. Area	Abs. Area	Molar Fraction	Error				molecule	Spin Pairs		Abs. Area	Abs. Area	Molar Fraction	Error
galactopyranose	C3	C4	28924000	25655000	0.59	0.05				galactopyranose	C3	C4	1150700000	1190600000	0.65	0.05				galactopyranose	C3	C4	1323500000	895280000	0.89	0.16				galactopyranose	C3	C4	1323500000	895280000	0.44	0.04
	C4	C5	27354000	23205000							C4	C5	1197660000	1120700000							C4	C5	1574500000	996170000							C4	C5	1574500000	996170000
galactasoamine	C1	C2	17862000	8190500	0.28	0.06				galactasoamine	C1	C2	546670000	625360000	0.21	0.04				galactasoamine	C1	C2	77596000	24697000	0.04	0.01				galactasoamine	C1	C2	77596000	24697000	0.3	0.05
	C3	C4	8240500	15912000							C3	C4	665670000	577360000							C3	C4	34697000	92396000							C3	C4	34697000	92396000
N-acetylgalactasoamine	C1	C2	4456800	7286800	0.13	0.02				N-acetylgalactasoamine	C1	C2	193190000	192680000	0.14	0.02				N-acetylgalactasoamine	C1	C2	79406000	111160000	0.07	0.01				N-acetylgalactasoamine	C1	C2	79406000	111160000	0.26	0.04
	C3	C4	7715800	4377800							C3	C4	252680000	143670000							C3	C4	51160000	109406000							C3	C4	51160000	109406000

## Sheet: Fig 3 d,e,f
Fig. 3d, GC-MS composition analysis of both AI (blue) and AS (orange) fractions.
			%/Fraction
		volume (ml)	Mannose	Glucose	Galactose	GlcNAc	GalNAc	AA
AI - MM		2	7.19686	58.3262	9.65481	22.2819	0.758539	1.78167
AS - MM		2	4.40824	67.8361	12.8484	0.667879	9.161	5.07841
Fig. 3e, Relative mass percentages of the AI and AS fractions.
	total (mg)	%
Total AI	5.61272	58.2854
Total AS	4.01701	41.7146
Fig. 3f, GC-MS composition analysis of both AI (blue) and AS (orange) fractions.
Enzyme digestions
	%
	β-Glucans	α-glucans
AI - MM	80.8889	19.1111
AS - MM	18.5714	81.4286
AI Tuo	80.5461	19.4539

## Sheet: Fig 4b
Fig. 4b, Protein secondary strucure secondary structure in both mobile and rigid phases of proteins
	Mobile			Rigid
Amino acid	Ca Observed	Ca coil	D	Ca Observed	Ca coil	D
leucine	55	52.8	2.2
Alanine	52.1	50.5	1.6
serine	57.3	56.2	1.1	59.2	56.2	3
Glutamic acid	55.5	54.7	0.8
Isoleucine	60.7	58.71	2
Threonine	61.1	59.5	1.6
Proline	61.3	61.1	0.2
valine	60.8	59.8	1	60.8	59.8	1
Argenine	55.5	53.9	1.6
Tyrosine	53.9	55.56	-1.66	55.7	55.56	0.14
Leucine				55.1	52.6	2.5

## Sheet: Supplementary Fig. 4
Supplementary Fig. 4a, Line-width for CORD spectra
53ms CORD		800 MHz
	Parental			α-1,3-glucan def.					GM def					Chitin def.					GAG def.								Parental					glucan def					GM def					Chitin def					GAG def
	w1 (ppm)	w2 (ppm)	ppm		w1 (ppm)	w2 (ppm)	ppm			w1 (ppm)	w2 (ppm)	ppm			w1 (ppm)	w2 (ppm)	ppm			w1 (ppm)	w2 (ppm)	ppm					ku80						b	c	a			b	c	a			b	c	a			b	c
	55.5	103.6			55.5	103.6	0.94			55.5	103.6	0.9			55.5	103.6				55.5	103.6	0.6					<0.3	1	1	0		<0.3	0	0	0		<0.3	0	0	0		<0.3	0	0	0		<0.3	0	1
		83				83	1.71				83					83					83						0.3-0.45	7	1	6		0.3-0.45	0	2	0		0.3-0.45	0	0	0		0.3-0.45	0	0	0		0.3-0.45	0	1
		75.7				75.7	0.89				75.7	0.74				75.7					75.7						0.45-0.6	16	0	6		0.45-0.6	19	0	0		0.45-0.6	15	0	5		0.45-0.6	12	0	4		0.45-0.6	12	4
		72.9				72.9	0.85				72.9					72.9					72.9	0.71					0.6-0.75	6	0	4		0.6-0.75	6	2	0		0.6-0.75	10	5	4		0.6-0.75	13	0	12		0.6-0.75	4	6
		60.9				60.9	0.97				60.9					60.9					60.9	0.9					0.75-0.9					0.75-0.9	4	3	0		0.75-0.9	3	7	3		0.75-0.9	4	0	4		0.75-0.9	0	0
	61.2	103.6	0.62		72	103	0.66			72	103	0.8			72	103				72	103						0.9-1.05					0.9-1.05	1	2	0		0.9-1.05	0	0	0		0.9-1.05	1	0	0		0.9-1.05	0	0
		86.4	0.58			83	2.28				83					83					83						1.05-1.20					1.05-1.20	0	1	0		1.05-1.20	0	0	0		1.05-1.20	0	0	0		1.05-1.20	0	0
		77.3	0.7			75.7					75.7					75.7					75.7						1.20-1.35					1.20-1.35	0	0	0		1.20-1.35	0	0	0		1.20-1.35	0	0	0		1.20-1.35	0	0
		74.3	0.57			60.9					60.9					60.9					60.9						1.35-1.5					1.35-1.5	0	0	0		1.35-1.5	0	0	0		1.35-1.5	0	0	0		1.35-1.5	0	0
		68.7	0.51			55.5	1.21				55.5					55.5					55.5						1.5-1.65					1.5-1.65	0	0	0		1.5-1.65	0	0	0		1.5-1.65	0	0	0		1.5-1.65	0	0
		61.3	0.59		75.7	103.6	0.41			75.7	103.6	0.67			75.7	103.6				75.7	103.6	0.41					1.65-1.80					1.65-1.80	0	0	0		1.65-1.80	0	0	0		1.65-1.80	0	0	0		1.65-1.80	0	0
	68.2	103.6				83					83	0.9				83					83						1.80-1.95					1.80-1.95	0	0	0		1.80-1.95	0	0	0		1.80-1.95	0	0	0		1.80-1.95	0	0
		86.9				75.7					72	0.64				72					72	0.75					1.95-2.10					1.95-2.10	0	0	0		1.95-2.10	0	0	0		1.95-2.10	0	0	0		1.95-2.10	0	0
		77.3				60.9					60.9					60.9					60.9	0.77					2.10-2.25					2.10-2.25	0	0	0		2.10-2.25	0	0	0		2.10-2.25	0	0	0		2.10-2.25	0	0
		74.4				55.5	0.43				55.5	0.87				55.5					55.5	0.83					2.25-2.40					2.25-2.40	0	0	0		2.25-2.40	0	0	0		2.25-2.40	0	0	0		2.25-2.40	0	0
		68.2			83	103.6				83	103.6	0.77			83	103.6				83	103.6	0.83					>2.40					>2.40	0	0	0		>2.40	0	0	0		>2.40	0	0	0		>2.40	0	0
		61.4				83					83					83					83
	69.7	100.8				75.7	0.63				75.7	0.76				75.7					75.7	0.81
		84.5				60.9					72	0.72				72					72	0.7
		71.9				55.5	0.8				55.5	0.86				55.5					55.5	0.89
		69.7			103.6	103.6				103.6	103.6				103.6	103.6				103.6	103.6
		60.8				83					83	0.9				83					83
	71.9	101	0.49			75.7					75.7	0.68				75.7					72abs	0.72
		84.6	0.52			60.9					60.9					60.9					60.9
		71.9	0.73			55.5					55.5					55.5					55.5
		69.5	0.41		103.6	103.6				103.6	103.6				103.6	103.6				103.6	103.6
		60.5	0.35			87	0.8				87	0.7				87	0.9				87
	72	103				77.4	0.57				77.4	0.58				77.4	0.6				77.4	0.6
		83				74.4	0.59				74.4					74.4	0.61				74.4	0.6
		75.7				68.7	0.56				68.7	0.53				68.7	0.62				68.7	0.59
		60.9				61.2	0.49				61.2	0.7				61.2	0.6				61.2	0.57
		55.5			87	103.6	0.51			87	103.6	0.56			87	103.6				87	103.6	0.55
	74.3	103.6	0.67			86.9					86.9					86.9	0.56				86.9
		86.7	0.42			77.4	0.57				77.4	0.55				77.4	0.56				77.4	0.62
		77.3	0.59			74.4	0.57				74.4	0.59				74.4	0.59				74.4	0.6
		74.3	0.63			61.3	0.55				61.3	0.5				61.3	0.52				61.3	0.59
		68.2	0.26			68.4	0.51				68.4	0.55				68.4	0.57				68.4	0.53
		61.2	0.5		77.5	103.6	0.51			77.5	103.6	0.59			77.5	103.6	0.56			77.5	103.6
	75.7	103.6				87	0.84				87	0.8				87	0.71				87
		83				77.4					77.4					77.4	0.64				77.4
		75.7				74.4	0.56				74.4	0.56				74.4	0.62				74.4
		60.9				68.7	0.55				68.7	0.55				68.7	0.55				68.7
		55.5				61.2	0.53				61.2	0.51				61.2	0.56				61.2
					74.3	103.6	0.55			74.3	103.6	0.63			74.3	103.6	0.61			74.3	103.6	0.57
	77.5	103.6	0.46			86.7	0.98				86.7					86.7	0.91				86.7
		87	0.37			77.3	0.63				77.3	0.64				77.3	0.62				77.3
		77.4	0.59			74.3					74.3					74.3					74.3	0.55
		74.4	0.34			68.2	0.6				68.2	0.61				68.2	0.62				68.2
		68.7	0.49			61.2	0.5				61.2	0.7				61.2	0.58				61.2
		61.2	0.45		68.2	103.6	0.55			68.2	103.6	0.56			68.2	103.6	0.55			68.2	103.6
	84.7	101.1	0.5			86.9	0.89				86.9	0.9				86.9	0.8				86.9
		84.7	0.68			77.3	0.61				77.3	0.64				77.3	0.64				77.3
		71.9	0.54			74.4	0.6				74.4	0.59				74.4	0.63				74.4
		60.5	0.38			68.2					68.2					68.2					68.2
		69	0.42			61.4	0.53				61.4	0.55				61.4	0.57				61.4
	87	103.6	0.52		61.2	103.6	0.55			61.2	103.6	0.8			61.2	103.6	0.55			61.2	103.6	0.57
		86.9	0.65			86.4	0.8				86.4					86.4					86.4
		77.4	0.41			77.3	0.6				77.3	0.7				77.3	0.65				77.3	0.64
		74.4	0.37			74.3	0.6				74.3	0.7				74.3	0.67				74.3	0.63
		61.3	0.46			68.7	0.54				68.7	0.61				68.7	0.5				68.7	0.57
		68.4	0.6			61.3					61.3					61.3					61.3
	101.1	101	0.5		101.1	101				101.1	101				101.1	101				101.1	101	0.54
		84.6	0.6			84.6					84.6	0.7				84.6	0.7				84.6	0.72
		71.8	0.66			71.8					71.8					71.8	0.9				71.8	0.78
		69.8	0.47			69.8					69.8	0.75				69.8	0.7				69.8	0.7
		60.9	0.36			60.9					60.9					60.9	0.7				60.9	0.64
		60.1	0.37			60.1					60.1					60.1					60.1	0.63
	103.6	103.6	0.63
		86.8	0.45		84.7	101.1				84.7	101.1	0.53			84.7	101.1	0.5			84.7	101.1
		83	0.27			84.7					84.7	0				84.7					84.7
		77.3	0.43			71.9					71.9					71.9	0.62				71.9
		74.3	0.52			60.5					60.5	0.6				60.5	0.66				60.5
		68.3	0.36			69					69	0.75				69	0.68				69
		61.2	0.49			100.8				69.7	100.8				69.7	100.8	0.61			69.7	100.8	0.55
		55	0.34			84.5					84.5					84.5					84.5	0.65
						71.9					71.9					71.9	0.66				71.9	0.76
						69.7					69.7					69.7					69.7	0.61
						60.8					60.8					60.8	0.7				60.8
					71.9	101				71.9	101	0.58			71.9	101	0.54			71.9	101	0.53
						84.6					84.6	0.9				84.6	0.88				84.6	0.92
						71.9					71.9	0.7				71.9	0.68				71.9
						69.5					69.5	0.7				69.5	0.65				69.5	0.67
						60.5					60.5	0.79				60.5	0.7				60.5	0.6
										60	101	0.56			60	101	0.55			60	101	0.57
											71	0.7				71	0.62				84	0.87
											69	0.6				69	0.64				71	0.67
																84	0.9				60	0.7
Supplementary Fig. 4b, Line-width for DP J-INADEQUATE spectra at 800 MHz
	800 MHz	Parental			800 MHz	α-1,3-glucan def.				800 MHz	GM def				800 MHz	Chitin def.				800 MHz	GAG def.
		F2	F1			F2	F1	ppm			F2	F1				F2	F1				F2	F1			Parental					α-glucan def.					GM def.					GAG def.					Chitin def.
	Galf	190	108.04		Galf	190	108.04	0.38		Galf	190	108.04	0.38		Galf	190	108.04	0.38		Galf	190	108.04	0.64			GM	gag	b			GM	GAG	β-glucn			GM	GAG	β-glucn			GM	GAG	β-glucn			GM	GAG	β-glucn
			82.27				82.27	0.62				82.27	0.63				82.27	0.65				82.27	0.37		<0.3	0	0	0		<0.3	0	0	0		<0.3	0	0	0		<0.3	0	0	0		<0.3	0	0	0
		161	77.7			161	77.7	0.59			161	77.7	0.49			161	77.7	0.63			161	77.7	0.64		0.3-0.45	9	6	2		0.3-0.45	3	6	1		0.3-0.45	3	5	1		0.3-0.45	4	0	1		0.3-0.45	5	6	2
			83.2				83.2	0.62				83.2	0.67				83.2	0.64				83.2	0.66		0.45-0.6	10	3	3		0.45-0.6	10	4	1		0.45-0.6	3	5	2		0.45-0.6	9	0	2		0.45-0.6	8	5	2
		160	81.7			160	81.7	0.83			160	81.7	0.58			160	81.7	0.76			160	81.7	0.85		0.6-0.75	8	3	1		0.6-0.75	9	2	1		0.6-0.75	6	4	3		0.6-0.75	13	0	3		0.6-0.75	12	2	2
			77.7				77.7	0.64				77.7	0.61				77.7	0.61				77.7	0.63		0.75-0.9	1	0	0		0.75-0.9	1	0	1		0.75-0.9	0	0	0		0.75-0.9	2	0	0		0.75-0.9	1	0	0
		155	83			155	83	0.62			155	83	0.66			155	83	0.6			155	83	0.58		0.9-1.05	0	0	0		0.9-1.05	0	0	0		0.9-1.05	0	0	0		0.9-1.05	0	0	0		0.9-1.05	0	0	0
			71.1				71.1	0.64				71.1	0.71				71.1	0.6				71.1	0.62		1.05-1.20	0	0	0		1.05-1.20	0	0	0		1.05-1.20	0	0	0		1.05-1.20	0	0	0		1.05-1.20	0	0	0
		135	71			135	71	0.5			135	71	0.49			135	71	0.62			135	71	0.57		1.20-1.35	0	0	0		1.20-1.35	0	0	0		1.20-1.35	0	0	0		1.20-1.35	0	0	0		1.20-1.35	0	0	0
			63				63	0.33				63	0.35				63	0.32				63	0.44		1.35-1.5	0	0	0		1.35-1.5	0	0	0		1.35-1.5	0	0	0		1.35-1.5	0	0	0		1.35-1.5	0	0	0
	Mn1,2	180	101.65		Mn1,2	180	101.65	0.42		Mn1,2	180	101.65	0.44		Mn1,2	180	101.65	0.4		Mn1,2	180	101.65	0.41		1.5-1.65	0	0	0		1.5-1.65	0	0	0		1.5-1.65	0	0	0		1.5-1.65	0	0	0		1.5-1.65	0	0	0
			78.9				78.9	0.68				78.9	0.63				78.9	0.7				78.9	0.85		1.65-1.80	0	0	0		1.65-1.80	0	0	0		1.65-1.80	0	0	0		1.65-1.80	0	0	0		1.65-1.80	0	0	0
		150	71.2			150	71.2				150	71.2				150	71.2	0.61			150	71.2	0.56		1.80-1.95	0	0	0		1.80-1.95	0	0	0		1.80-1.95	0	0	0		1.80-1.95	0	0	0		1.80-1.95	0	0	0
			78				78					78					78	0.48				78	0.74		1.95-2.10	0	0	0		1.95-2.10	0	0	0		1.95-2.10	0	0	0		1.95-2.10	0	0	0		1.95-2.10	0	0	0
		139	71			139	71	0.58			139	71				139	71	0.68			139	71	0.6		2.10-2.25	0	0	0		2.10-2.25	0	0	0		2.10-2.25	0	0	0		2.10-2.25	0	0	0		2.10-2.25	0	0	0
			67				67	0.66				67					67	0.65				67	0.65		2.25-2.40	0	0	0		2.25-2.40	0	0	0		2.25-2.40	0	0	0		2.25-2.40	0	0	0		2.25-2.40	0	0	0
		136	73			136	73	0.37			136	73				136	73	0.6			136	73	0.57		>2.40	0	0	0		>2.40	0	0	0		>2.40	0	0	0		>2.40	0	0	0		>2.40	0	0	0
			61				61					61					61	0.36				61	0.43
		142	74			142	74	0.63			142	74				142	74	0.7			142	74	0.71
			67				67	0.58				67					67	0.6				67	0.65
	Mn1,6	174	71		Mn1,6	174	71	0.54		Mn1,6	174	71			Mn1,6	174	71	0.57		Mn1,6	174	71	0.48
			102.7				102.7	0.47				102.7					102.7	0.42				102.7	0.46
		144	73			144	73	0.6			144	73				144	73	0.53			144	73	0.7
			70				70	0.57				70					70	0.59				70	0.62
		140	72			140	72	0.64			140	72				140	72				140	72	0.68
			68				68	0.46				68					68					68	0.47
		139	73			139	73				139	73				139	73	0.56			139	73	0.58
			66				66	0.45				66					66	0.46				66	0.49
	GAlNac	153	96.06		GAlNac	153	96.06	0.34		GAlNac	153	96.06	0.34		GAlNac	153	96.06	0.31		GAlNac	153	96.06
			57.8				57.8	0.41				57.8	0.53				57.8	0.44				57.8
		152	75			152	75				152	75	0.55			152	75				152	75
			76				76	0.58				76	0.37				76	0.55				76
	GalN	147	91		GalN	147	91	0.35		GalN	147	91	0.64		GalN	147	91	0.33		GalN	147	91
			54				54	0.48				54	0.6				54	0.5				54
	Galp	165	93.2		Galp	165	93.2	0.37		Galp	165	93.2	0.34		Galp	165	93.2	0.35		Galp	165	93.2
			72.2				72.2	0.56				72.2	0.6				72.2	0.55				72.2
		146	73.5			146	73.5	0.63			146	73.5	0.54			146	73.5	0.6			146	73.5
			72.5				72.5	0.39				72.5	0.38				72.5	0.7				72.5
		143	72.2			143	72.2	0.7			143	72.2	0.72			143	72.2	0.43			143	72.2
			70				70					70	0.46				70	0.59				70
	α-1,3-glucan	134	72		α-1,3-glucan	134	72	0.56		α-1,3-glucan	134	72	0.54		α-1,3-glucan	134	72	0.4		α-1,3-glucan	134	72
			61				61	0.31				61	0.35				61	0.59				61
	β-1,3-glucan	178	103.57		β-1,3-glucan	178	103.57	0.41		β-1,3-glucan	178	103.57	0.44		β-1,3-glucan	178	103.57	0.44		β-1,3-glucan	178	103.57	0.44
			74.1				74.1	0.54				74.1	0.65				74.1	0.62				74.1	0.58
		148	77			148	77				148	77	0.64			148	77	0.58			148	77	0.65
			70.86				70.86					70.86	0.59				70.86	0.58				70.86	0.6
		138	77			138	77	0.82		beta glui	138	77	0.61		beta glui	138	77	0.63		beta glui	138	77	0.73
			61				61	0.6				61	0.37				61	0.39				61	0.71
[truncated: 1 more columns]

## Sheet: Supplementary Fig.10b,c,d
Supplementary Fig. 10, Pseudo 3D 13C-T1 relaxation of polysaccharides in the cell wall of Aspergillus fumigatus
Supplementary Figure 10b		Parental
β-1,3-glucan	time (s)	86.4 ppm	77.1 ppm	74.4 ppm	68.7 ppm			time (s)	103.6 ppm	77.1 ppm	74.4 ppm	68.7 ppm			time (s)	103.6 ppm	86.4 ppm	74.4 ppm	68.7 ppm			time (s)	103.6 ppm	86.4 ppm	77.1 ppm	68..7 ppm			time (s)	103.6 ppm	86.4 ppm	77.1 ppm	74.4 ppm
103.6ppm	0	1	0.730567	1	1		86.4ppm	0	1	0.781176	1	0.832171		77.1ppm	0	1	1	1	1		74.4ppm	0	1	1	1	1		68.7ppm	0	1	1	1	0.947611
	0.1	0.897778	1	0.771597	0.759992			0.1	0.90801	1	0.793316	1			0.1	0.878648	0.940518	0.971025	0.593539			0.1	0.767196	0.965855	0.891475	0.157519			0.1	0.701088	0.987833	0.894593	1
	1	0.495633	0.530852	0.46424	0.770405			1	0.029674	0.275616	0.388225	0.469668			1	0.556351	0.572732	0.446938	0.136881			1	0.484613	0.414803	0.388041	0.0261339			1	0.314546	0.481513	0.254384	0.516266
	3	0.234746	0.0333141	0.0530363	0.187115			3	0.0501914	0.219825	0.109191	0.114876			3	0.0406481	0.236928	0.0546191	0.0201534			3	0.153064	0.205198	0.0406399	0.160556			3	0.0156015	0.2094	0.156983	0.207401
	8	0.274677	0.0869542	0.0512062	0.238756			8	0.0976338	0.125236	0.138828	0.704948			8	0.0457548	0.560174	0.0915461	0.219448			8	0.0924769	0.0249065	0.24249	0.118511			8	0.000139096	0.0914626	0.220808	0.0849981
α-1,3-glucan	time (s)	84.6ppm	71.7/71.9ppm	69.5ppm				time (s)	101ppm	84.6ppm	69.5ppm				time (s)	101ppm	71.7/71.9ppm	69.5ppm				time (s)	101ppm	84.6ppm	71.7/71.9ppm
101ppm	0	1	1	0.89823			71.7/71.9ppm	0	0.884919	0.88986				84.6ppm	0	0.858756	1	0.788589			69.5ppm	0	1	1	1
	0.1	0.771075	0.952778	1				0.1	1	1	1				0.1	1	0.908736	0.865886				0.1	0.764179	0.757116	0.679261
	1	0.985733	0.971952	0.63769				1	0.813073	0.982812	0.574387				1	0.87513	0.871651	1				1	0.895846	0.874777	0.795403
	3	0.292225	0.485903	0.632893				3	0.279224	0.256838	0.206013				3	0.429311	0.398816	0.50256				3	0.63727	0.522211	0.339685
	8	0.0441558	0.0385313	0.0958787				8	0.0807004	0.0832835	0.120294				8	0.175088	0.0082928	0				8	0.0359634	0.0705805	0.00292063
chitin	time (s)	83ppm	75.7ppm	72.9ppm	55.5ppm			time (s)	103.6ppm	83ppm	75.7ppm	55.5ppm			time (s)	103.6ppm	83ppm	72.9ppm	55.5ppm			time (s)	103.6ppm	75.7ppm	72.9ppm	55.5ppm			time (s)	103.6ppm	83ppm	75.7ppm	72.9ppm
103.6ppm	0				1		72.9ppm	0	1	1	1	1		75.7ppm	0		1				83ppm	0	1	1	1	1		55.5ppm	0		1	1
	0.1	0.966954	1	1	0.659084			0.1	0.546152	0.561576	0.609272	0.0863678			0.1	1	0.804881	1	1			0.1	0.539645	0.939236	0.995694	0.123119			0.1	1	0.951917	0.621583	1
	1	1	0.618683	0.387711	0.890373			1	0.353254	0.657923	0.491513	0.546277			1	0.595632	0.538727	0.22979	0.717139			1	0.690465	0.692149	0.925289	1.10551			1	0.301592	0.794219	0.515809	0.50223
	3	0.528863	0.214202	0.145644	0.0475977			3	0.133545	0.32557	0.201144	0.10068			3	0.192886	0.420182	0.113992	0.351502			3	0.73449	0.303208	0.83265	0.0332821			3	0.224144	0.28263	0.0212725	0
	8	0.191877	0.158231	0.0579339				8	0.23585	0.533132	0.401775	0.0402254			8	0.014268	0.180345	0.267174	0.656402			8	0.123828	0.178446	0.0346463	0			8	0.248958	0.120232	0.0582803	0.315455
Supplementary Figure 10c		α-1,3-glucan def.
β-1,3-glucan	time (s)	86.4 ppm	77.1 ppm	74.4 ppm	68.7 ppm			time (s)	103.6 ppm	77.1 ppm	74.4 ppm	68.7 ppm			time (s)	103.6 ppm	86.4 ppm	74.4 ppm	68.7 ppm			time (s)	103.6 ppm	86.4 ppm	77.1 ppm	68..7 ppm			time (s)	103.6 ppm	86.4 ppm	77.1 ppm	74.4 ppm
103.6ppm	0	1	1	1	1		86.4ppm	0	1	1	1	1		77.1ppm	0	1	1	1	1		74.4ppm	0	1	1	1	1		68.7ppm	0	1	1	1	1
	0.1	0.960104	0.981626	0.969428	0.93249			0.1	0.919091	0.939177	0.94423	0.988725			0.1	0.854609	0.910676	0.852252	0.739551			0.1	0.924662	0.938278	0.936422	0.937982			0.1	0.938462	0.979095	0.945278	0.963144
	1	0.461896	0.467737	0.529892	0.487755			1	0.403641	0.371662	0.418027	0.418895			1	0.316198	0.346632	0.318181	0.284727			1	0.473854	0.430654	0.389566	0.467551			1	0.403268	0.391899	0.395737	0.405575
	3	0.143644	0.147047	0.201308	0.153143			3	0.127636	0.128353	0.118579	0.153331			3	0.0760916	0.0932379	0.107111	0.0972202			3	0.170506	0.0994381	0.1157	0.12543			3	0.16302	0.135843	0.104189	0.204579
	8	0.214813	0	0.0857484	0.0278255			8	0.0142177	0.0380393	0.0235066	0.0282743			8	0.00741685	0.030482	0.0124854	0.00197799			8	0.0255954	0.0176788	0.0412416	0.0541231			8	0.049367	0	0.00926154	0.0510362
chitin	time (s)	83ppm	75.7ppm	72.9ppm	55.5ppm			time (s)	103.6ppm	83ppm	75.7ppm	55.5ppm			time (s)	103.6ppm	83ppm	72.9ppm	55.5ppm			time (s)	103.6ppm	75.7ppm	72.9ppm	55.5ppm			time (s)	103.6ppm	83ppm	75.7ppm	72.9ppm
103.6ppm	0	1	1	1	1		72.9ppm	0	1	1	1	1		75.7ppm	0	1	1	1	1		83ppm	0	1	1	1	1		55.5ppm	0	1	1	1	1
	0.1	0.935151	0.710586	0.962917	0.95091			0.1	0.749415	0.848565	0.655228	0.770361			0.1	0.936609	0.9998	0.9995	0.972308			0.1	0.899667	0.904545		0.979734			0.1	0.92518	0.992646	0.874201	0.913909
	1	0.638241	0.512698	0.483038	0.720475			1	0.359821	0.577132	0.754926	0.589017			1	0.301757	0.602461	0.517237	0.517925			1	0.653925	0.66354	0.773354	0.718598			1	0.392811	0.523417	0.421237	0.18645
	3	0.494854	0.234469	0.273468	0.486851			3	0.295589	0.510187	0.561314	0.38588			3	0.188694	0.488769	0.376567	0.508385			3	0.492781	0.508631	0.675255	0.610167			3	0.396709	0.494538	0.337261	0.390093
	8	0.108804	0.0810097	0.0971114	0.152572			8	0.0691516	0.219933	0.165303	0.128906			8	0.0693685	0.160275	0.0792691	0.129436			8	0.107533	0.247615	0.230121	0.138253			8	0.134733	0.201671	0.103519	0.11399
Supplementary Figure 10d		chitin def.
β-1,3-glucan	time (s)	86.4 ppm	77.1 ppm	74.4 ppm	68.7 ppm			time (s)	103.6 ppm	77.1 ppm	74.4 ppm	68.7 ppm			time (s)	103.6 ppm	86.4 ppm	74.4 ppm	68.7 ppm			time (s)	103.6 ppm	86.4 ppm	77.1 ppm	68..7 ppm			time (s)	103.6 ppm	86.4 ppm	77.1 ppm	74.4 ppm
103.6ppm	0	0.825164	0.788407	0.831864	0.948972		86.4ppm	0	0.985864	1	1	1		77.1ppm	0	0.931142	1	1	1		74.4ppm	0	0.714835	0.786316	0.912887	0.863859		68.7ppm	0	1	1	1	1
	0.1	1	1	1	1			0.1	1	0.958973	0.863747	0.821003			0.1	1	0.73386	0.813983	0.880071			0.1	1	1	1	1			0.1		0.90523		0.925774
	1	0.549621	0.494605	0.671085	0.701545			1	0.464756	0.543536	0.470334	0.217102			1	0.25352	0.3966	0.294429	0.0554216			1	0.571891	0.442702	0.59817	0.53454			1	0.92103	0.778302	0.587961	0.859623
	3	0.176815	0.121093	0.304637	0.54903			3	0.280131	0.163956	0.315827	0.692713			3	0.0198229	0.031081	0.0876786	0.0136934			3	0.190153	0.139495	0.0702892	0.449931			3	0.497587	0.357179	0.15713	0.544034
	8	0.0421732	0.024484	0.115705	0.256751			8	0.119755	0.0474252	0.0545032	0.0316756			8	0.0154357	0.0471723	0.01349	0.0226216			8	0.138028	0.0503713	0.0315684	0.239513			8	0.375137	0.0585186	0.0787051	0.261688
α-1,3-glucan	time (s)	84.6ppm	71.7/71.9ppm	69.5ppm				time (s)	101ppm	84.6ppm	69.5ppm				time (s)	101ppm	71.7/71.9ppm	69.5ppm				time (s)	101ppm	84.6ppm	71.7/71.9ppm
101ppm	0	1	1	1			71.7/71.9ppm	0						84.6ppm	0	0.788885	0.850758	0.869956			69.5ppm	0	1	1	1
	0.1	0.982431	0.961287	0.703248				0.1	1	1	1				0.1	1	1	1				0.1	0.771545	0.833162	0.637008
	1	1	0.932982	0.768183				1	0.897859	0.892141	0.640667				1	0.994843	0.952406	0.924242				1	0.768841	0.834036	0.571874
	3	0.559247	0.308069	0.473849				3	0.629239	0.646451	0.417934				3	0.717823	0.71739	0.679052				3	0.460406	0.539282	0.30957
	8	0.353394	0.292425	0.218452				8	0.201696	0.204186	0.123655				8	0.272719	0.258815	0.264602				8	0.172751	0.190332	0.11674

## Sheet: Supplementary Fig 11a,b,c,d,e
Supplementary Fig. 11, Water 1H spin diffusion of polysaccharides at using mixing times
Supplementary Figure 11a
β-1,3-glucan	Time (ms)	√ Time	103.6ppm	86.4ppm	77.1ppm	74.4ppm	68.7ppm
	0.001	0	0.117202	0.0979293	0.20874	0.172427	0.194991
	1	1	0.100124	0.111928	0.215893	0.182911	0.165696
	4	2	0.334019	0.315172	0.432579	0.392335	0.439586
	9	3	0.559012	0.562093	0.625746	0.604468	0.608952
	16	4	0.759084	0.759272	0.81163	0.797388	0.799641
	25	5	0.884626	0.77878	0.812389	0.873563	0.91489
	36	6	1	1	1	1	1
	49	7	1.02643	1.00406	0.928194	0.996128	0.933739
	64	8	1.01745	0.985771	0.921829	0.997845	0.796156
	81	9	1.01038	0.960923	0.862281	0.957351	0.802437
	100	10	0.831917	0.536692	0.499133	0.74274	0.802818
α-1,3-glucan	Time (ms)	√ Time	101ppm	84.6ppm	71.7/71.9ppm	69.5ppm
	0.001	0	0.216284	0.0957014	0.293189	0.207339
	1	1	0.197649	0.0798553	0.295151	0.199539
	4	2	0.30028	0.227883	0.479207	0.404065
	9	3	0.39503	0.29436	0.638188	0.698214
	16	4	0.533508	0.445617	0.807208	0.831488
	25	5	0.481669	0.448966	0.891275	0.927829
	36	6	0.802168	0.769982	0.961338	0.939657
	49	7	0.666547	0.768015	0.984543	1.03313
	64	8	0.871574	0.931782	0.980535	0.990442
	81	9	1	1	1	1
	100	10	0.587996	0.646897	0.954392	0.915029
chitin	Time (ms)	√ Time	55.5ppm	75.7ppm	72.9ppm	83.0ppm
	0.001	0	0.163121	0.117109	0.219151	0.147721
	1	1	0.0729048	0.172981	0.240347	0.241198
	4	2	0.209895	0.297295	0.350875	0.300251
	9	3	0.305343	0.569114	0.556036	0.517278
	16	4	0.427026	0.75977	0.715734	0.672647
	25	5	0.558072	0.802109	0.777997	0.551097
	36	6	0.605778	0.768982	0.839342	1.09552
	49	7	0.759482	1.01431	0.965311	0.969822
	64	8	0.802366	1.04542	0.965696	0.974002
	81	9	1	1	1	1
	100	10	1.12673	0.638465	0.823197	0.633514
Supplementary Figure 11b
β-1,3-glucan	Time (ms)	√ Time	103.6ppm	86.4ppm	77.1ppm	74.4ppm	68.7ppm
	0.001	0	0.126111	0.0750543	0.170655	0.120093	0.0677225
	1	1	0.0907	0.0762264	0.21499	0.0975328	0.0222813
	4	2	0.122305	0.0857589	0.269399	0.180936	0.182836
	9	3	0.224319	0.185056	0.361234	0.297925	0.276185
	16	4	0.343798	0.318792	0.544351	0.426441	0.330228
	25	5	0.425033	0.414742	0.707212	0.552476	0.381403
	36	6	0.571744	0.570375	0.858984	0.687579	0.536413
	49	7	0.728614	0.728484	0.927329	0.829765	0.819465
	64	8	0.872094	0.854882	0.977527	0.927833	0.865828
	81	9	0.918056	0.904059	0.98959	0.964497	0.966139
	100	10	1	1	1	1	1
α-1,3-glucan	Time (ms)	√ Time	101ppm	84.6ppm	71.7/71.9ppm	69.5ppm
	0.001	0	0.11886	0.0892369	0.148094	0.0705214
	1	1	0.181957	0.0956732	0.165106	0.0267161
	4	2	0.188519	0.0686957	0.224638	0.177402
	9	3	0.258322	0.148551	0.297604	0.248898
	16	4	0.325939	0.240952	0.382137	0.339628
	25	5	0.407377	0.350503	0.477201	0.387456
	36	6	0.521005	0.486756	0.572821	0.528609
	49	7	0.633836	0.639411	0.744827	0.727701
	64	8	0.803828	0.808913	0.860229	0.817334
	81	9	0.797213	0.895949	0.960972	0.933212
	100	10	1	1	1	1
chitin	Time (ms)	√ Time	55.5ppm	75.7ppm	72.9ppm	83.0ppm
	0.001	0	0.197528	0.10019	0.132528	0.251749
	1	1	0.123749	0.125288	0.146053	0.190333
	4	2	0.188954	0.199544	0.193605	0.18188
	9	3	0.266997	0.307618	0.271151	0.259056
	16	4	0.249421	0.443153	0.370505	0.398173
	25	5	0.19816	0.583817	0.494001	0.487983
	36	6	0.364789	0.724309	0.581082	0.724917
	49	7	0.652853	0.85427	0.743605	0.799113
	64	8	0.671782	0.899618	0.859311	0.904317
	81	9	0.90274	0.962506	0.96976	0.950486
	100	10	1	1	1	1
Supplementary Figure 11c
β-1,3-glucan	Time (ms)	√ Time	103.6ppm	86.4ppm	77.1ppm	74.4ppm	68.7ppm
	0.001	0	0.0570559	0.177522	0.170753	0.17318	0.152185
	1	1	0.117786	0.127351	0.174688	0.143003	0.11915
	4	2	0.232091	0.163728	0.287581	0.227656	0.2477
	9	3	0.319273	0.225196	0.318235	0.315574	0.345166
	16	4	0.437236	0.462773	0.479437	0.443362	0.491891
	25	5	0.602568	0.625947	0.669397	0.542799	0.493683
	36	6	0.701364	0.709205	0.716421	0.680603	0.729267
	49	7	0.858585	0.85581	0.870355	0.840353	0.891202
	64	8	0.910222	0.945255	0.923991	0.922265	1
	81	9	0.96673	0.961951	0.921106	0.910352	0.990646
	100	10	1	1	1	1	0.924886
α-1,3-glucan	Time (ms)	√ Time	101ppm	84.6ppm	71.7/71.9ppm	69.5ppm
	0.001	0	0.0822846	0.088849	0.115502	0.113787
	1	1	0.0262365	0.0615889	0.0801092	0.0804024
	4	2	0.0840244	0.126733	0.164447	0.189492
	9	3	0.157925	0.173829	0.227603	0.288338
	16	4	0.222668	0.287615	0.308553	0.396472
	25	5	0.180176	0.301061	0.3916	0.41991
	36	6	0.400344	0.418927	0.521005	0.641378
	49	7	0.600472	0.602923	0.693361	0.818621
	64	8	0.830634	0.81038	0.852988	0.945658
	81	9	0.867367	0.911747	0.9105	0.999825
	100	10	1	1	1	1
chitin	Time (ms)	√ Time	55.5ppm	75.7ppm	72.9ppm	83.0ppm
	0.001	0	0	0.152913	0.0661769	0.0242688
	1	1	0	0.111421	0.0708781	0.133204
	4	2	0.107505	0.183616	0.107552	0.161843
	9	3	1.65278	0.245762	0.182715	0.145913
	16	4	0.370026	0.370703	0.245252	0.299688
	25	5	0.154443	0.504949	0.306736	0.347793
	36	6	0.448217	0.596816	0.406375	0.431711
	49	7	0.543034	0.769426	0.548746	0.64607
	64	8	1.01522	0.855394	0.683816	0.808282
	81	9	0.95787	0.879152	0.694756	0.741593
	100	10	1	1	1	1
Supplementary Figure 11d
β-1,3-glucan	Time (ms)	√ Time	103.6ppm	86.4ppm	77.1ppm	74.4ppm	68.7ppm
	0.001	0	0.119247	0.0706014	0.139326	0.144139	0.0795198
	1	1	0.0696504	0.0276939	0.0960322	0.0947992	0.104602
	4	2	0.183512	0.143176	0.264109	0.244254	0.220468
	9	3	0.32707	0.264432	0.413107	0.389363	0.33978
	16	4	0.459359	0.400997	0.562934	0.537316	0.481173
	25	5	0.624485	0.538578	0.700103	0.663777	0.585736
	36	6	0.74958	0.532992	0.748666	0.734814	0.717634
	49	7	0.910704	0.850293	0.904436	0.905954	0.861158
	64	8	1	1	1	1	0.938767
	81	9	0.994413	0.976784	0.924437	0.954854	1
	100	10	0.895787	0.950677	0.833975	0.895354	0.946278
α-1,3-glucan	Time (ms)	√ Time	101ppm	84.6ppm	71.7/71.9ppm	69.5ppm
	0.001	0	0.0888148	0.0595288	0.123756	0.0885319
	1	1	0.110047	0.0288387	0.141814	0.111662
	4	2	0.127174	0.102202	0.229354	0.217519
	9	3	0.232234	0.176619	0.323929	0.326606
	16	4	0.3103	0.289468	0.419294	0.440817
	25	5	0.403036	0.383979	0.522228	0.549955
	36	6	0.501223	0.474843	0.613113	0.655148
	49	7	0.697901	0.675965	0.741002	0.834313
	64	8	0.875382	0.857849	0.923881	0.947863
	81	9	0.956514	0.927223	0.982512	1
	100	10	1	1	1	0.981335
Supplementary Figure 11e
β-1,3-glucan	Time (ms)	√ Time	103.6ppm	86.4ppm	77.1ppm	74.4ppm	68.7ppm
	0.001	0	0.0655378	0.0448934	0.0968269	0.0909133	0.108828
	1	1	0.0510345	0.0624196	0.0795479	0.0710255	0.0822902
	4	2	0.163005	0.160064	0.214885	0.172487	0.21902
	9	3	0.282728	0.30525	0.349305	0.303035	0.339304
	16	4	0.429926	0.484232	0.496722	0.430079	0.434433
	25	5	0.575773	0.622999	0.621905	0.574702	0.628062
	36	6	0.704776	0.743349	0.743141	0.683821	0.749
	49	7	0.870879	0.930153	0.9094	0.862365	0.920243
	64	8	0.971856	1.02444	1	0.952929	0.975227
	81	9	1	1	0.784352	1	1
	100	10	0.991626	0.966594	0.983031	0.996536	0.92894
chitin	Time (ms)	√ Time	55.5ppm	75.7ppm	72.9ppm	83.0ppm
	0.001	0	0.0426646	0.0658939	0.0491939	0.0212043
	1	1	0.0460141	0.0555296	0.0651429	0.0343128
	4	2	0.0596771	0.18252	0.122263	0.127151
	9	3	0.0949723	0.313013	0.248556	0.247645
	16	4	0.134357	0.3343	0.65123	0.391753
	25	5	0.284454	0.565939	0.521357	0.385648
	36	6	0.445479	0.67358	0.633604	0.437677
	49	7	0.613191	0.837388	0.812091	0.637547
	64	8	0.698655	0.958615	0.871943
	81	9	0.913603	1	1	0.850406
	100	10	1	0.948448	0.982841	1

## Sheet: Supplementary Fig.12
Supplementary Figure 12 Cell wall thickness violin plot
Parental	Cell wall thickness(nm)	Total counts	Average	Standard deviation		a-1,3-glucan def.	Cell wall thickness(nm)	Total counts	Average	Standard deviation		Chitin def.	Cell wall thickness(nm)	Total counts	Average	Standard deviation		GAG def.	Cell wall thickness(nm)	Total counts	Average	Standard deviation		GM def.	Cell wall thickness(nm)	Total counts	Average	Standard deviation
Cell number 1	186.462	11	206.034	56.7375		Cell number 1	224	11	143.212	47.691			94.048	11	111.181	90.5373			108.653	11	117.04	35.2477			110.691		133.409	38.2367
	188.683						235						108.497		90.5373				106.23						112.992
	210.077						253						109.689						162.98						156.541
	275.743						293						172.4						108.333						144.578
	209.202						319						137.334						117.334						129.561
	200.665						243						182.835						76.83						65.11
	180.468						242						166.254						93.634						126.885
	146.077						313						130.036						106.23						143.898
	142.38						252						125.454						83.853						103.008
	217.558						198						125.454						96.195						99.005
	150.718						230						114.618						78.285						165.963
Cell number 2	196.343	12				Cell number 2	107.617	11					100	11					149.979	11					109
	159.393						97.942						71						118.961						118
	237.051						99.92						82						163.854						114
	188.154						92.273						106						104.389						131
	177.211						101.191						110						113.904						185
	184.443						107.914						84						140.179						135
	209.161						89.371						80						133.356						162
	162.959						115.077						75						96.883						104
	270.16						68.063						109						128.218						107
	198.789						114.451						89						126.474						201
	201.948						114.311						130						117.835						157
	197.443
Cell number 3	287	11				Cell number 3	88.73	11					87	11					133	11					93
	113						106.578						86						127						107
	185						133.413						89						138						131
	199						130.56						86						124						133
	165						88.48						85						107						81
	212						92.239						68						84						102
	158						95.156						75						143						95
	171						119.205						95						151						93
	148						86.709						65						139						158
	183						126.888						75						120						114
	154						134.571						79						121						100
Cell number 4	201.313	12				Cell number 4	137.437	11					69	11					144	11					165
	174.973						162.072						50						139						129
	242.046						135.208						56						162						127
	192.44						136.486						51						121						155
	163.343						160.349						50						100						131
	157.001						121.12						45						133						148
	172.123						112.114						37						109						130
	152.415						136.486						35						126						155
	168.781						147.667						49						136						142
	129.912						126.93						56						143						169
	145.154						84.553						52						126						173
	159.548
Cell number 5	148	12				Cell number 5	188	11					18.786	11					132	11					98
	192						230						23.178						166						91
	223						215						25.204						179						96
	168						202						18.257						152						131
	210						190						22.139						154						103
	175						213						12.524						127						109
	124						195						23.845						133						111
	195						202						23.093						125						113
	167						151						23.178						153						105
	225						222						19.802						131						115
	130						265						17.931						121						118
	130
Cell number 6	199	11				Cell number 6	109.814	10					231	11					115	11					112
	180						143.359						224						137						100
	160						142.014						226						104						77
	350						107.31						170						111						88
	278						83.218						145						133						82
	204						118.163						204						124						72
	213						108.643						222						142						69
	190						84.078						252						122						91
	202						113.185						229						125						53
	341						127.034						208						120						84
	171												219						99						145
Cell number 7	187.522	11				Cell number 7	180.363	11					43.844	11					158	11					113.459
	163.322						168.726						42.418						171						104.372
	145.149						142.014						62.868						127						139.163
	168.945						118.703						74.51						173						103.619
	166.108						152.022						55.459						130						107.265
	203.373						152.18						61.382						236						113.27
	174.2						164.891						45.733						183						86.134
	159.907						175.601						47.222						227						105.255
	127.601						153.071						38.623						165						98.113
	141.99						163.967						47.869						147						90.645
	141.99						173.632						47.869						133						120.755
Cell number 8	170.358	11				Cell number 8	148	11					62	11					78.567	11					156
	163.787						113						52						57.616						126
	167.058						155						106						79.263						140
	156.776						109						96						50.376						105
	174.671						148						91						52.64						143
	168.021						175						146						86.701						138
	162.735						91						188						73.796						166
	146.73						121						121						71.146						149
	161.419						128						111						70.759						170
	144.262						151						148						85.907						181
	162.735						165						153						104.297						195
Cell number 9	244.884	11				Cell number 9	114.332	11					187	11					87	11					134.34
	222.315						132.697						189						96						96.231
	163.267						158.908						160						92						100.663
	182.472						172.281						276						81						103.846
	164.924						137.702						234						93						100.074
	177.629						113.183						158						70						92.628
	179.689						119.527						142						81						84.964
	208.154						83.374						181						104						93.026
	197.018						94.444						175						141						87.874
	200.639						117.647						154						161						87.198
	193.039						113.725						161						102						86.432
Cell number 10	241.775	11				Cell number 10	101	11					73	11					79.699	11					135
	220.618						90						78						118.929						137
	199.394						116						80						152.053						121
	187.354						111						125						167.475						121
	243.535						113						92						168.19						123
	182.151						103						85						192.167						112
	208.369						80						91						105.906						150
	216.71						111						91						73.756						118
	204.541						118						80						103.769						133
	186.401						126						111						128.81						144
	200.569						77						122						140.684						111
Cell number 11	340	11				Cell number 11	113	11					32.897	11					73.56	11					189
	373						130						38.71						80.903						180
	374						151						51.613						98.743						189
	320						172						50.078						93.937						138
	309						137						51.613						90.38						211
	326						146						44.93						94.874						143
	366						142						37.619						70.747						187
	261						134						32.258						82.242						191
	296						148						59.481						125.268						231
	317						116						39.376						143.249						230
	296						161						39.901						114.049						179
Cell number 12	210.698	11				Cell number 12	117.117	11					21.627	11					135.928	11					146
	241.605						157.135						28.633						146.457						146
	201.841						173.241						19.71						144.525						250
	190.375						136.545						21.396						154.852						161
	199.444						144.923						20.179						130.995						156
	221.112						169.001						23.007						119.788						192
	200.037						184.072						22.303						146.356						129
	236.155						140.617						23.031						138.941						177
	227.444						140.975						27.933						104.627						170
	198.552						176.326						24.128						139.367						178
	204.172						182.312						23.737						150.443						134
Cell number 13	311.949	11				Cell number 13	120	11					290	11					70.129	11					200
	226.345						109						226						74.316						147
	283.351						128						250						44.217						195
	297.617						109						311						58.537						187
	318.597						136						371						66.288						173
	323.827						120						476						83.812						144
	259.384						130						381						71.973						189
	286.356						116						384						57.931						235
	329.314						125						414						51.189						161
	200.639						101						335						64.281						163
	249.928						134						227						49.69						178
